# Supplementary material
Source: PubMed Central journal article supplement (PMC6481419)

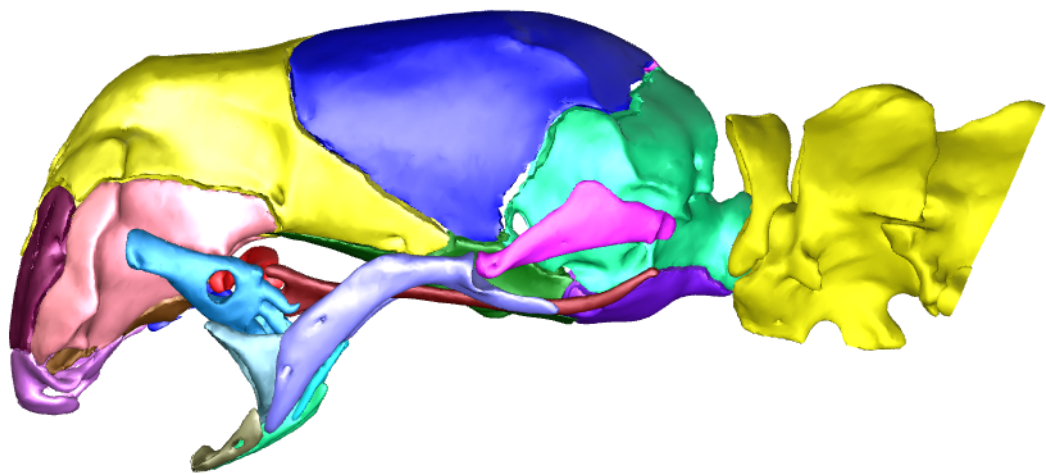

Supplement: JOA-234-637-s001.pdf [file JOA-234-637-s001.pdf]

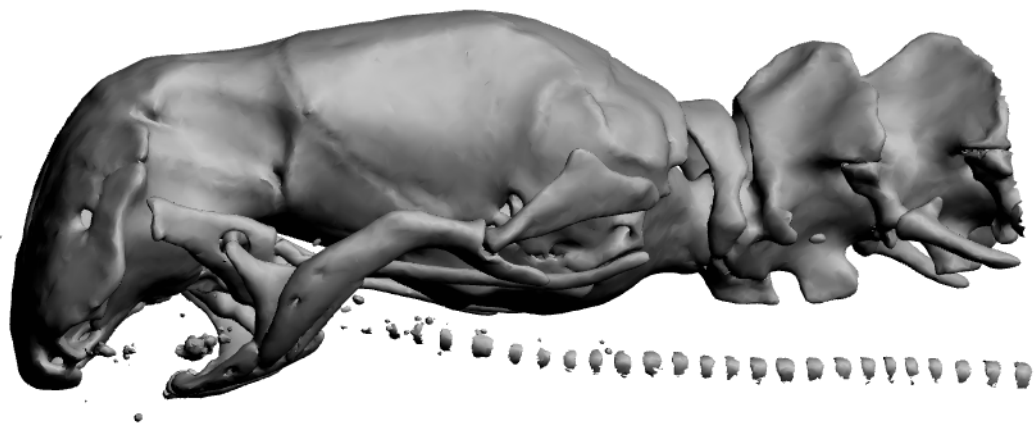

Supplement: JOA-234-637-s002.pdf [file JOA-234-637-s002.pdf]

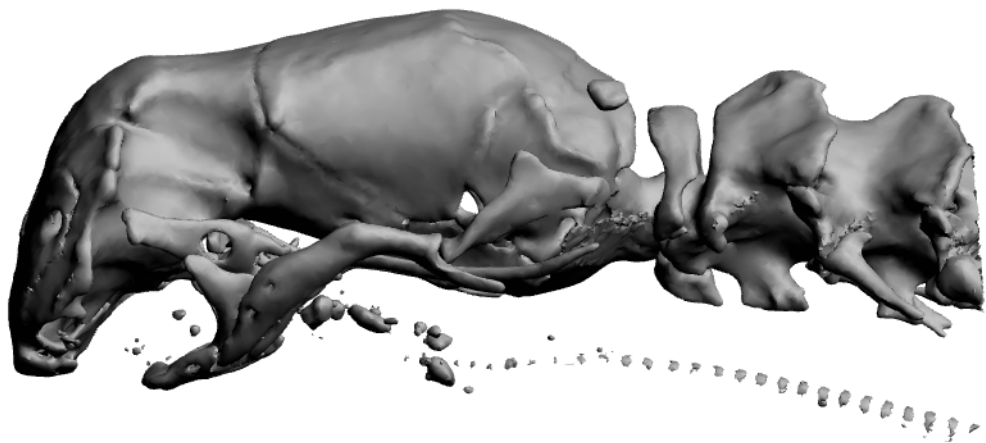

Supplement: JOA-234-637-s003.pdf [file JOA-234-637-s003.pdf]
